# Supplementary material for: Dioxygen activation by a dinuclear thiolate-ligated Fe(ii) complex
Source: Royal Society of Chemistry journal article supplement (doi:10.1039/c8dt04491k), 2018-11-27
Supplement: c8dt04491k1.pdf [file c8dt04491k1.pdf]

## Dioxygen Activation by a Dinuclear Thiolate-ligated Fe(II) Complex

Chang-Chih Hsieh,<sup>a</sup> Yu-Chiao Liu,<sup>b</sup> Mei-Chun Tseng,<sup>b</sup> Ming-Hsi Chiang<sup>b</sup> and Yih-Chern Horng<sup>a\*</sup>

<sup>a</sup>Department of Chemistry, National Changhua University of Education, Changhua 50058, Taiwan

<sup>b</sup>Institute of Chemistry, Academia Sinica, Taipei 11528, Taiwan, Republic of China

### Electronic Supporting Information

#### Table of Contents

|            | Title                                                                                                               | P. |
|------------|---------------------------------------------------------------------------------------------------------------------|----|
| Table S0   | Summary of Crystallographic Data                                                                                    | 2  |
| Table S1   | Selected bond lengths and angles for <b>1</b>                                                                       | 3  |
| Table S2   | Bond lengths and angles of complexes with Fe <sup>II</sup> -Fe <sup>II</sup> (μ-SR) <sub>2</sub> cores              | 4  |
| Figure S1  | Cyclic Voltammetry analyses of <b>1</b> at RT                                                                       | 4  |
| Figure S2  | Packing diagrams of <b>1</b>                                                                                        | 4  |
| Table S3   | Selected bond lengths and angles for <b>2</b>                                                                       | 5  |
| Figure S3  | EPR spectrum of complex <b>2</b> in 50% DMSO aqueous solution                                                       | 6  |
| Figure S4  | Time-dependent <sup>1</sup> H NMR spectra of <b>1</b> and (LNHS) <sub>2</sub> exposed to O <sub>2</sub>             | 7  |
| Figure S5  | <sup>1</sup> H NMR spectra of pure (LNHS) <sub>2</sub> exposed to O <sub>2</sub>                                    | 8  |
| Figure S6  | ORTEP drawings of (LNHS) <sub>2</sub> and LN-S                                                                      | 9  |
| Figure S7  | <a href="#">Solid IR spectra of complex <b>1</b> and oxygenated complex <b>1</b></a>                                | 10 |
| Figure S8  | UV-vis spectral changes of the decaying Fe <sup>III</sup> -O <sub>2</sub> -Fe <sup>III</sup> intermediate           | 11 |
| Figure S9  | ESI-TOF MS analysis of <b>1</b> reacted with O <sub>2</sub> in DMF at -50°C                                         | 11 |
| Figure S10 | HRMS data along with isotopic distribution pattern of Fe <sup>III</sup> -O <sub>2</sub> -Fe <sup>III</sup> complex  | 12 |
| Figure S11 | HRMS data along with isotopic distribution pattern of monomeric <b>1</b> complex                                    | 13 |
| Figure S12 | <sup>31</sup> P{ <sup>1</sup> H} NMR spectrum of PPh <sub>3</sub> in the presence of <b>1</b> exposed to air in DMF | 14 |
| Figure S13 | HRMS of anthracene for hydride-transfer reaction                                                                    | 14 |
| Figure S14 | Ball- and stick-type drawings of the intermediate <b>A</b>                                                          | 15 |
| Figure S15 | Ball- and stick-type drawings of the transition state <b>TS</b>                                                     | 15 |
|            | References                                                                                                          | 16 |

## Supplementary Tables and Figures

**Table S0.** The summary of crystallographic data for complexes and organic ligands.

|                                                                                                                                     | Complex 1                                                                                    | Complex 2 · H <sub>2</sub> O                                                   | (LNHS) <sub>2</sub>                                                          | LN-S                                                            |
|-------------------------------------------------------------------------------------------------------------------------------------|----------------------------------------------------------------------------------------------|--------------------------------------------------------------------------------|------------------------------------------------------------------------------|-----------------------------------------------------------------|
| formula                                                                                                                             | C <sub>52</sub> H <sub>44</sub> Fe <sub>2</sub> N <sub>8</sub> O <sub>4</sub> S <sub>4</sub> | C <sub>34</sub> H <sub>42</sub> FeN <sub>5</sub> O <sub>3</sub> S <sub>2</sub> | C <sub>26</sub> H <sub>22</sub> N <sub>4</sub> O <sub>2</sub> S <sub>2</sub> | C <sub>13</sub> H <sub>10</sub> N <sub>2</sub> O <sub>2</sub> S |
| fw                                                                                                                                  | 1084.89                                                                                      | 688.70                                                                         | 486.60                                                                       | 242.30                                                          |
| temp, K                                                                                                                             | 150(2)                                                                                       | 150(2)                                                                         | 296(2) K                                                                     | 296(2) K                                                        |
| cryst syst                                                                                                                          | Monoclinic                                                                                   | Monoclinic                                                                     | Monoclinic                                                                   | Monoclinic                                                      |
| space group                                                                                                                         | <i>P2(1)/n</i>                                                                               | <i>P2(1)/c</i>                                                                 | <i>P2(1)/n</i>                                                               | <i>P2(1)/c</i>                                                  |
| <i>a</i> , Å                                                                                                                        | 11.1144(6)                                                                                   | 15.879(3)                                                                      | 7.8144(4)                                                                    | 9.9938(16)                                                      |
| <i>b</i> , Å                                                                                                                        | 15.7599(7)                                                                                   | 12.862(3)                                                                      | 19.0194(9)                                                                   | 13.994(2)                                                       |
| <i>c</i> , Å                                                                                                                        | 14.9052(7)                                                                                   | 16.892(3)                                                                      | 15.7767(7)                                                                   | 8.1879(13)                                                      |
| $\alpha$ , °                                                                                                                        | 90                                                                                           | 90                                                                             | 90                                                                           | 90                                                              |
| $\beta$ , °                                                                                                                         | 105.382(3)                                                                                   | 102.985(14)                                                                    | 95.996(3)                                                                    | 97.361(11)                                                      |
| $\gamma$ , °                                                                                                                        | 90                                                                                           | 90                                                                             | 90                                                                           | 90                                                              |
| Volume, Å <sup>3</sup> / <i>Z</i>                                                                                                   | 2517.3(2)/2                                                                                  | 3361.8(11)/4                                                                   | 2331.99(19)/4                                                                | 1135.7(3)/4                                                     |
| Density (cald.),<br>Mg/m <sup>3</sup>                                                                                               | 1.431                                                                                        | 1.361                                                                          | 1.386                                                                        | 1.417                                                           |
| Absorption<br>coefficient, mm <sup>-1</sup>                                                                                         | 0.796                                                                                        | 0.615                                                                          | 0.261                                                                        | 0.267                                                           |
| crystal size, mm                                                                                                                    | 0.25 x 0.16 x 0.07                                                                           | 0.17 x 0.07 x 0.05                                                             | 0.27 x 0.08 x<br>0.08                                                        | 0.32 x 0.11 x<br>0.11                                           |
| $\theta$ range, deg                                                                                                                 | 1.92 to 28.72                                                                                | 2.01 to 24.50                                                                  | 1.68 to 28.28                                                                | 2.05 to 28.79                                                   |
| no. of reflns<br>collected                                                                                                          | 29928                                                                                        | 31974                                                                          | 34428                                                                        | 13677                                                           |
| no. of indep reflns                                                                                                                 | 6489                                                                                         | 5583                                                                           | 5720                                                                         | 2935                                                            |
| max. and min. trans                                                                                                                 | 0.940 and 0.852                                                                              | 0.960 and 0.940                                                                | 0.979 and 0.933                                                              | 0.952 and 0.944                                                 |
| no. of data<br>/restraints /params                                                                                                  | 6489 / 0 / 324                                                                               | 5583 / 3 / 418                                                                 | 5720 / 0 / 307                                                               | 2935 / 0 / 154                                                  |
| goodness-of-fit on<br><i>F</i> <sup>2</sup>                                                                                         | 0.789                                                                                        | 0.937                                                                          | 0.866                                                                        | 0.985                                                           |
| final <i>R</i> indices                                                                                                              | 0.0350                                                                                       | 0.0629                                                                         | 0.0533                                                                       | 0.0389                                                          |
| [ <i>I</i> > 2 $\sigma$ ( <i>I</i> )] <i>R</i> <sub><i>I</i></sub> <sup><i>a</i></sup> , <i>wR</i> <sub>2</sub> <sup><i>b</i></sup> | 0.1019                                                                                       | 0.1419                                                                         | 0.1274                                                                       | 0.1295                                                          |
| <i>R</i> indices (all data),<br><i>R</i> <sub><i>I</i></sub> <sup><i>a</i></sup> , <i>wR</i> <sub>2</sub> <sup><i>b</i></sup>       | 0.0539                                                                                       | 0.1547                                                                         | 0.1514                                                                       | 0.0541                                                          |
|                                                                                                                                     | 0.1213                                                                                       | 0.2051                                                                         | 0.1768                                                                       | 0.1428                                                          |
| largest diff. peak<br>and hole, e Å <sup>-3</sup>                                                                                   | 0.377 and -0.373                                                                             | 0.302 and -0.365                                                               | 0.194 and -0.223                                                             | 0.163 and -0.307                                                |

$$^a R_I = \Sigma |F_0| - |F_c| / \Sigma |F_0|$$

$$^b wR_2 = [\Sigma [\omega(F_0^2 - F_c^2)^2] / \Sigma [\omega(F_0^2)^2]]^{1/2}$$

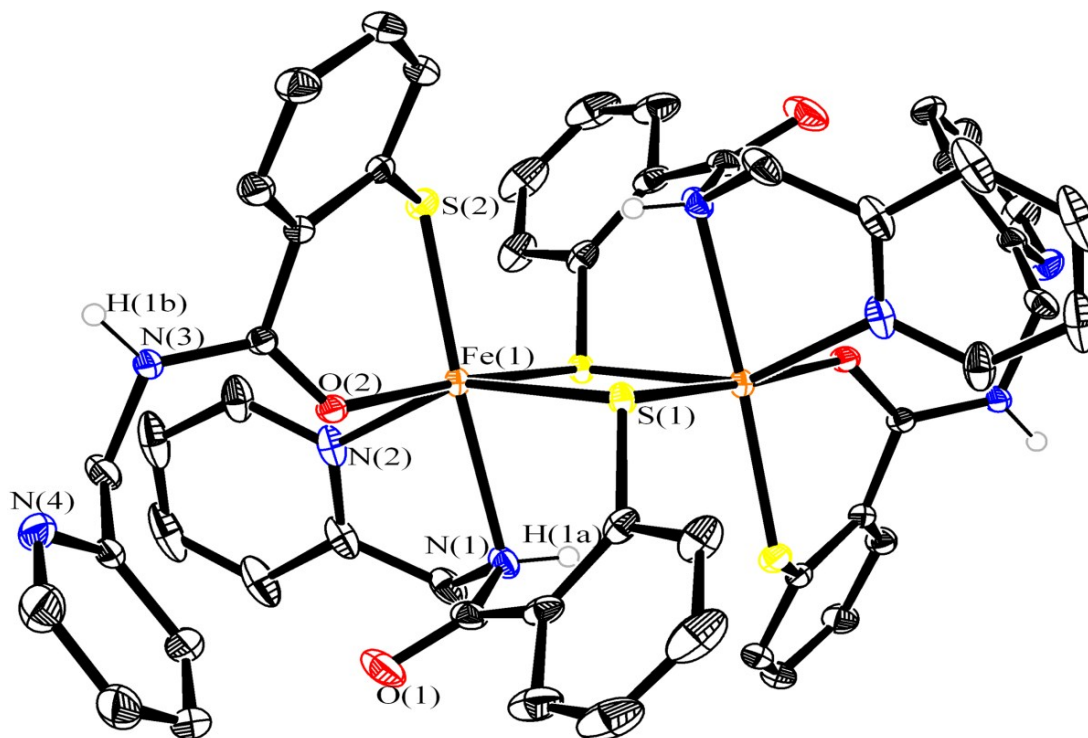

**Table S1.** Selected bond lengths (Å) and angles (°) for complex **1<sup>a</sup>**

|                  |             |                   |            |
|------------------|-------------|-------------------|------------|
| Fe(1)- Fe(1)A    | 3.5477(4)   | S(1)-Fe(1)-O(2)   | 94.35(4)   |
| Fe(1)-S(1)       | 2.4451(6)   | S(2)-Fe(1)-S(1)A  | 94.477(19) |
| Fe(1)-S(1)A      | 2.5306(5)   | S(2)-Fe(1)-N(1)   | 174.53(5)  |
| Fe(1)-S(2)       | 2.3555(6)   | S(2)-Fe(1)-N(2)   | 106.80(6)  |
| Fe(1)-N(1)       | 2.45020(20) | S(2)-Fe(1)-O(2)   | 89.64(4)   |
| Fe(1)-N(2)       | 2.1430(18)  | N(1)-Fe(1)-S(1)A  | 80.07(5)   |
| Fe(1)-O(2)       | 2.1788(14)  | N(1)-Fe(1)-N(2)   | 73.43(7)   |
| S(1)-S(1)A       | 3.4899(6)   | N(1)-Fe(1)-O(2)   | 95.78(6)   |
| S(1)-Fe(1)-S(2)  | 101.25(2)   | N(2)-Fe(1)-S(1)A  | 93.28(5)   |
| S(1)-Fe(1)-S(1)A | 89.060(18)  | N(2)-Fe(1)-O(2)   | 81.41(6)   |
| S(1)-Fe(1)-N(1)  | 79.11(5)    | O(2)-Fe(1)-S(1)A  | 174.05(4)  |
| S(1)-Fe(1)-N(2)  | 151.57(6)   | Fe(1)-S(1)-Fe(1)A | 90.941(18) |

<sup>a</sup> Symmetry transformations used to generate equivalent atoms: A: 1 -x+1,-y,-z+1.

**Table S2.** Collected bond lengths (Å) and angles (°) for complexes with similar Fe<sup>II</sup>-Fe<sup>II</sup>(μ-SR)<sub>2</sub> cores

| Metal complex                                                                                 | Fe-Fe              | S-S                | Fe-S  | Fe-S  | Fe-S <sup>a</sup> | Fe-S-Fe            | S-Fe-S              | C. N. |
|-----------------------------------------------------------------------------------------------|--------------------|--------------------|-------|-------|-------------------|--------------------|---------------------|-------|
| (μ-S,S)[Fe(L <sup>AP</sup> ) <sub>2</sub> ] <sub>2</sub> <sup>1</sup>                         | 2.919              | 3.799 <sup>b</sup> | 2.397 | 2.394 | 2.396             | 75.07 <sup>b</sup> | 104.93 <sup>b</sup> | 5     |
| [(bme*-daco)Fe] <sub>2</sub> <sup>2</sup>                                                     | 3.31               | 3.595 <sup>b</sup> | 2.444 | 2.441 | 2.443             | 85.24 <sup>b</sup> | 94.76 <sup>b</sup>  | 5     |
| [(bme-daco)Fe] <sub>2</sub> <sup>3</sup>                                                      | 3.217 <sup>b</sup> | 3.611 <sup>b</sup> | 2.421 | 2.417 | 2.419             | 83.4               | 96.6                | 5     |
| [Fe(C <sub>8</sub> H <sub>18</sub> N <sub>2</sub> S <sub>2</sub> )] <sub>2</sub> <sup>4</sup> | 3.206              | 3.558              | 2.471 | 2.379 | 2.425             | 82.68 <sup>b</sup> | 97.32 <sup>b</sup>  | 5     |
| [Fe(C <sub>9</sub> H <sub>20</sub> N <sub>2</sub> S <sub>2</sub> )] <sub>2</sub> <sup>4</sup> | 3.371              | 3.641              | 2.490 | 2.411 | 2.451             | 86.91 <sup>b</sup> | 93.09 <sup>b</sup>  | 5     |
| [Fe('N <sub>2</sub> H <sub>2</sub> S <sub>3</sub> ')] <sub>2</sub> <sup>5</sup>               | 3.340 <sup>b</sup> | 3.673 <sup>b</sup> | 2.517 | 2.447 | 2.482             | 84.57 <sup>b</sup> | 95.43 <sup>b</sup>  | 6     |
| [Fe(pyCO <sub>2</sub> MeS <sub>4</sub> )] <sub>2</sub> <sup>6</sup>                           | 3.391 <sup>b</sup> | 3.146 <sup>b</sup> | 2.348 | 2.277 | 2.313             | 94.28 <sup>b</sup> | 85.72 <sup>b</sup>  | 6     |
| Complex 1                                                                                     | 3.548              | 3.490              | 2.531 | 2.445 | 2.488             | 90.94              | 89.06               | 6     |

<sup>a</sup> Averaged of bond lengths or angles. <sup>b</sup> The data were measured by Mercury 3.5.1 software.

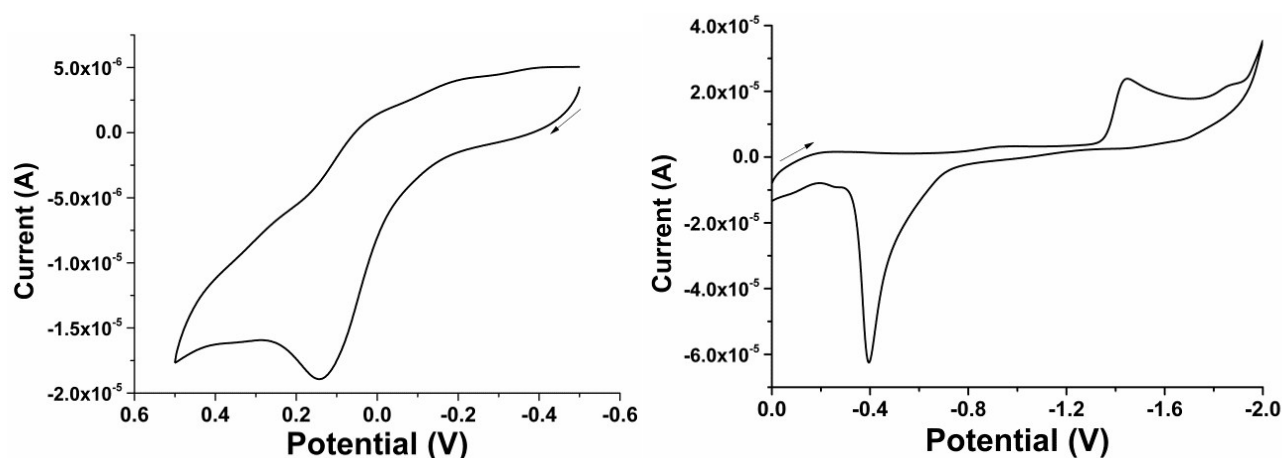**Figure S1.** Cyclic voltammetry analyses of **1** (1 mM) at RT, scan rate 0.05 V/s.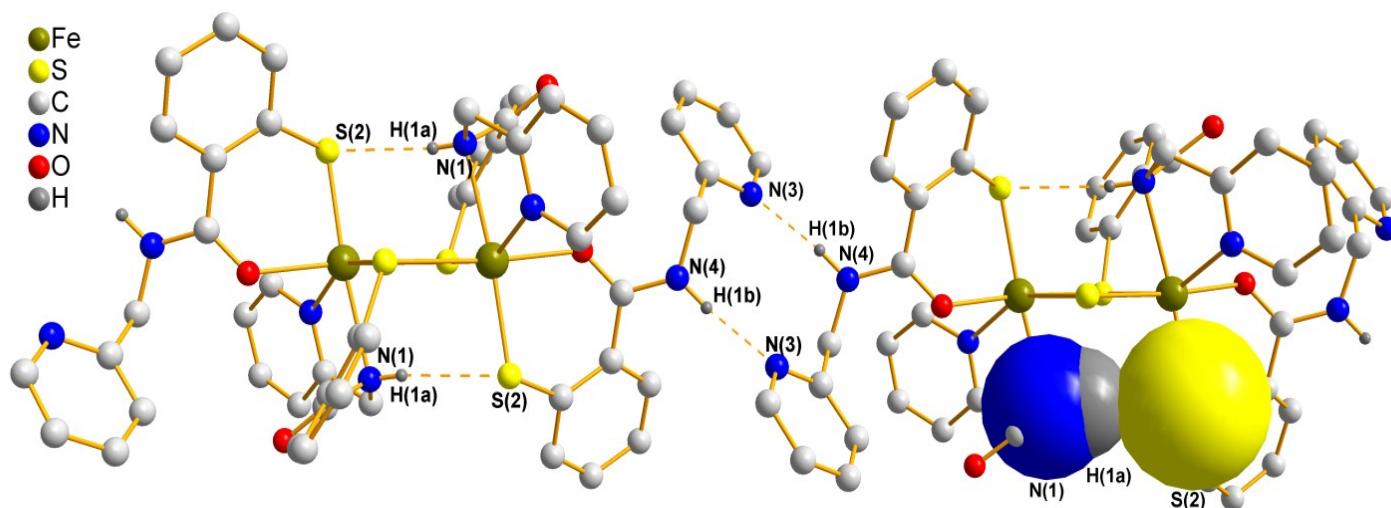**Figure S2.** Packing diagrams of complex **1** with NH⋯S intramolecular (N⋯S: 3.379 Å, NH⋯S: 2.587 Å and ∠NH⋯S: 173.37°) and NH⋯N intermolecular (N⋯N: 2.911 Å, NH⋯N: 2.034 Å and ∠NH⋯N: 163.56°) hydrogen bond interactions. The space-fill drawings of NH⋯S intramolecular hydrogen bond interactions are shown in the right molecule. Some carbon atoms are omitted for clarity.

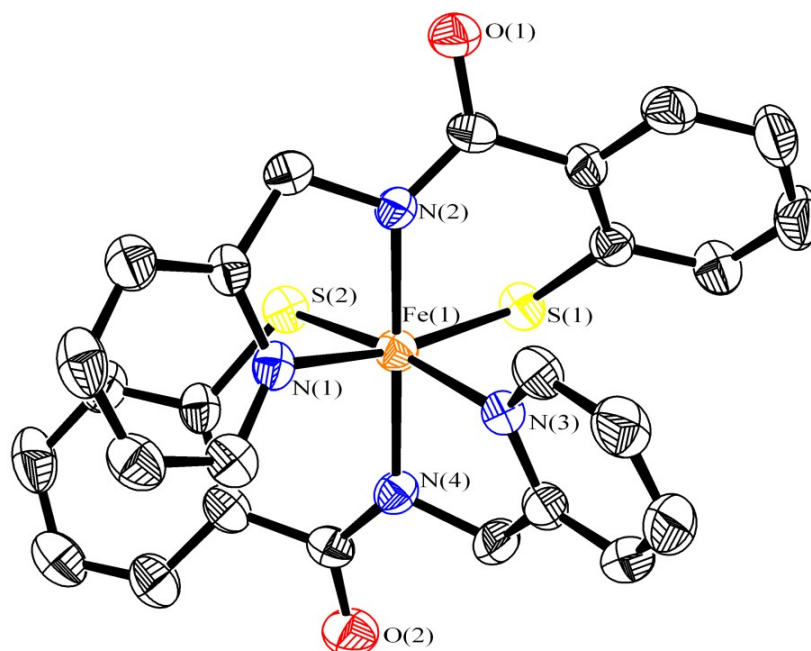

**Table S3.** Selected bond lengths (Å) and angles (°) for complex **2**

|                 |            |                 |            |
|-----------------|------------|-----------------|------------|
| Fe(1)-S(1)      | 2.265(2)   | S(2)-Fe(1)-N(1) | 89.78(15)  |
| Fe(1)-S(2)      | 2.265(2)   | S(2)-Fe(1)-N(2) | 93.24(16)  |
| Fe(1)-N(1)      | 2.018(5)   | S(2)-Fe(1)-N(3) | 171.26(17) |
| Fe(1)-N(2)      | 1.942(5)   | S(2)-Fe(1)-N(4) | 90.77(17)  |
| Fe(1)-N(3)      | 2.002(5)   | N(1)-Fe(1)-N(2) | 79.8(2)    |
| Fe(1)-N(4)      | 1.949(5)   | N(1)-Fe(1)-N(3) | 92.0(2)    |
| S(1)-Fe(1)-S(2) | 89.15(7)   | N(1)-Fe(1)-N(4) | 96.4(2)    |
| S(1)-Fe(1)-N(1) | 170.11(17) | N(2)-Fe(1)-N(3) | 95.5(2)    |
| S(1)-Fe(1)-N(2) | 90.45(16)  | N(2)-Fe(1)-N(4) | 174.4(2)   |
| S(1)-Fe(1)-N(3) | 90.59(16)  | N(3)-Fe(1)-N(4) | 80.5(2)    |
| S(1)-Fe(1)-N(4) | 93.45(16)  |                 |            |

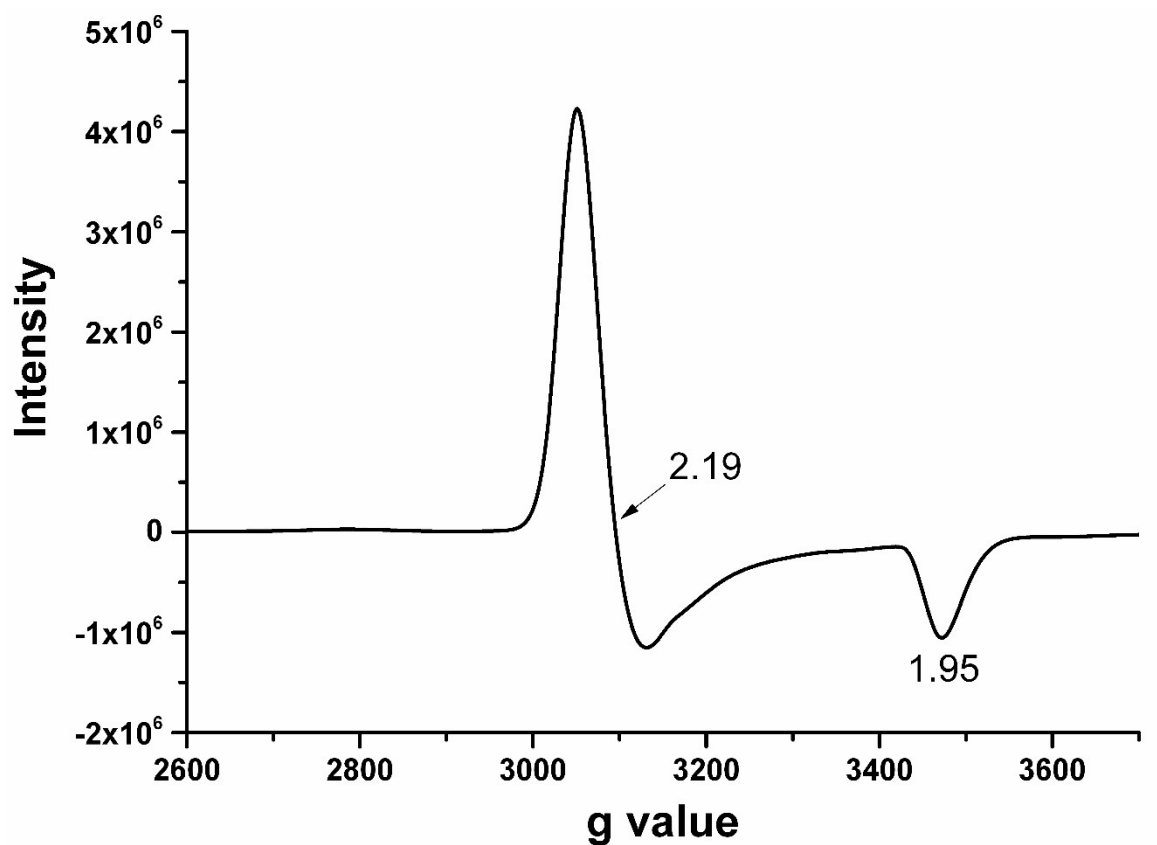

**Figure S3.** EPR spectrum of complex **2** in 50% DMSO aqueous solution measured at 77 K. Spectrometer settings: microwave frequency, 9.5 GHz; modulation frequency, 100 kHz; modulation amplitude, 10 G; time constant, 655.36 msec; conversion time, 20.48 msec; microwave power, 0.632 mW; receiver gain,  $5.02 \times 10^3$ .

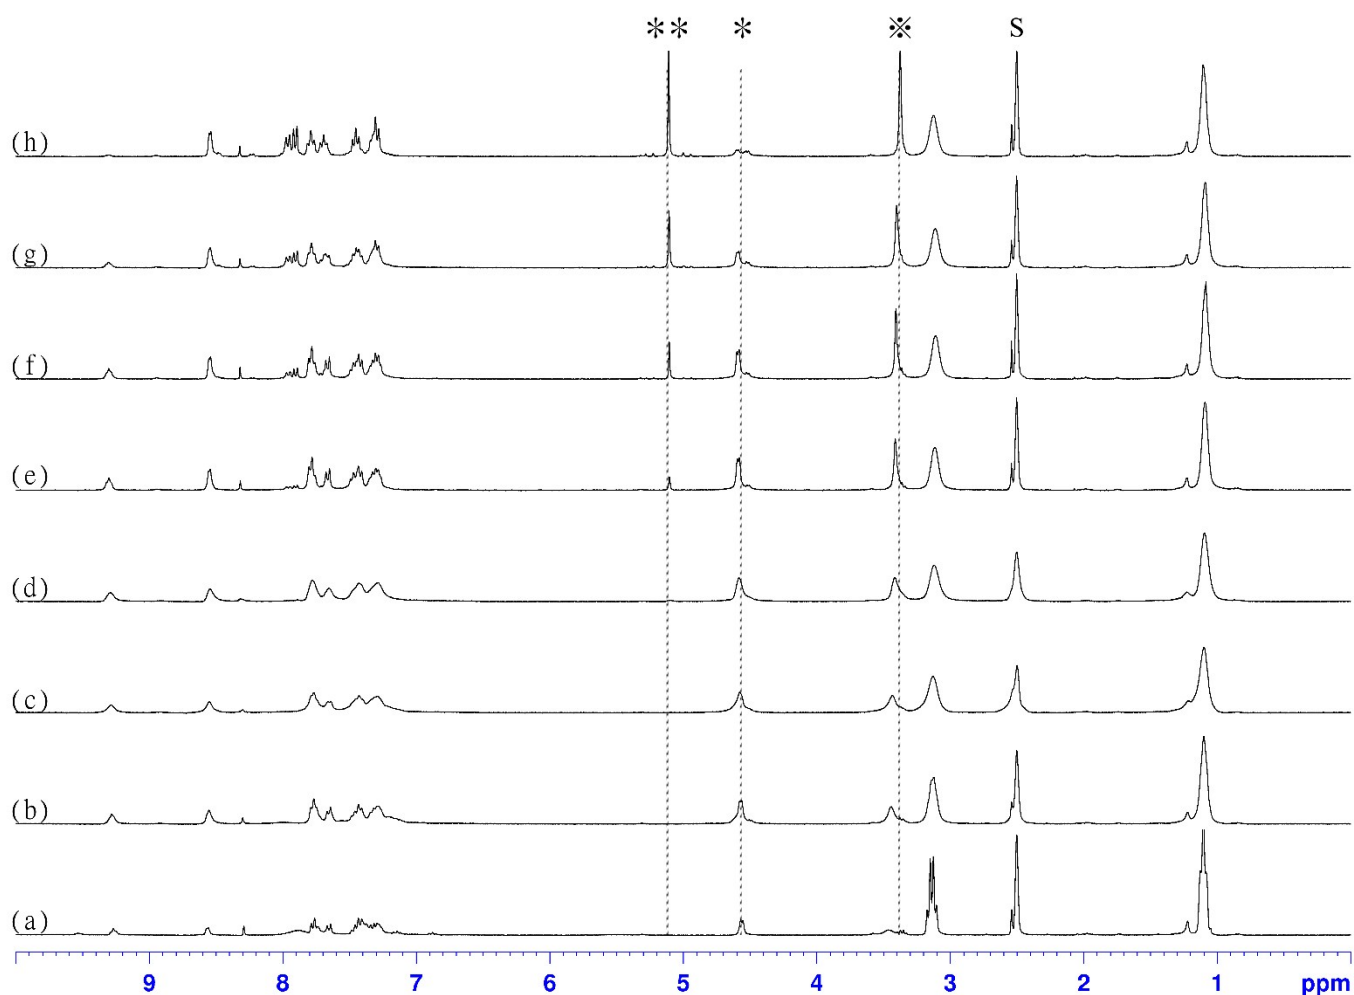

**Figure S4** Time-dependent <sup>1</sup>H NMR spectra in d<sub>6</sub>-DMSO (S) of (a) the solution containing pure **1** and one equiv (LNHS)<sub>2</sub> in N<sub>2</sub>(g), (b) after addition of oxygen for 10 mins, (c) for 25 mins, (d) for 2 h, (e) for 6 h, (f) for 11 h, (g) for 1 day, and (h) for 2 days. The chemical shifts of CH<sub>2</sub>(\*) in (LNHS)<sub>2</sub>, CH<sub>2</sub>(\*\*) in LN-S, and H<sub>2</sub>O (※) are marked.

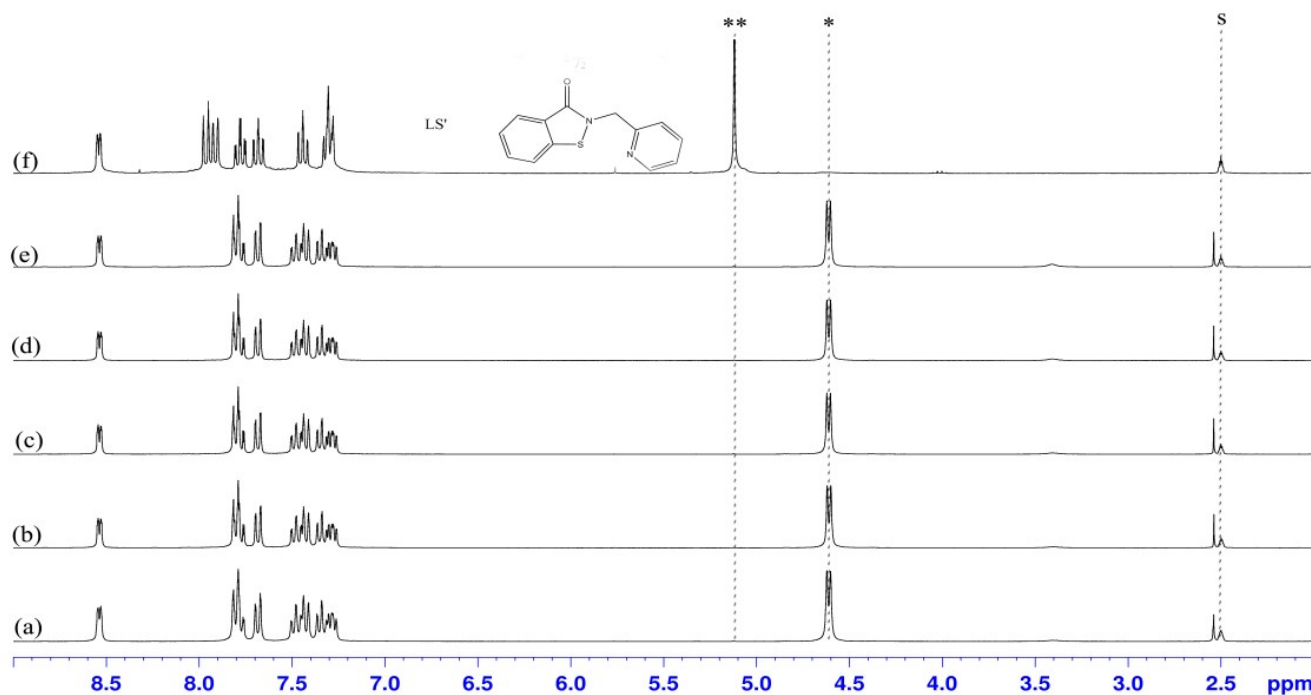

**Figure S5.**  $^1\text{H}$  NMR spectra (300 MHz, 298 K,  $\text{d}_6\text{-DMSO}$  (S)) of pure  $(\text{LNHS})_2$  in air for (a) 0 day, (b) 1 days, (c) 2 days, (d) 3 days, (e) 4 days, and (f) of pure LN-S. The chemical shifts of  $\text{CH}_2$  (\*) in  $(\text{LNHS})_2$  and  $\text{CH}_2$  (\*\*) in LN-S are indicated. LN-S was not generated from the solution of  $(\text{LNHS})_2$  in DMSO for 5 days in air.



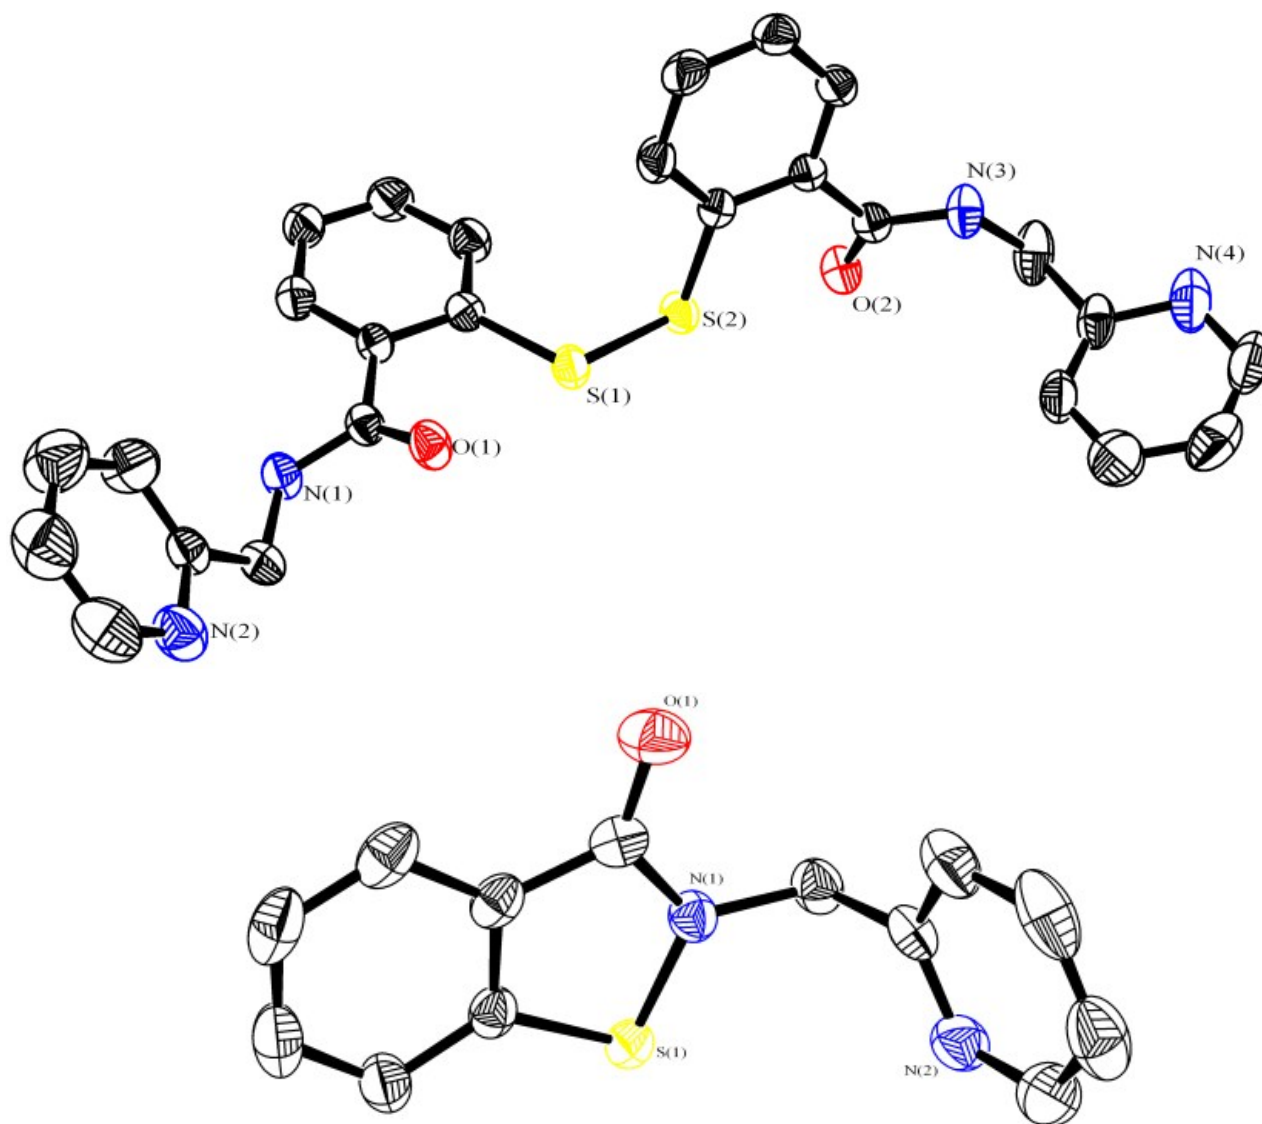

**Figure S6.** ORTEP drawings of  $(\text{LNHS})_2$  (Top) and LN-S (Bottom). The thermal ellipsoids are drawn at the 35% probability level. Hydrogen atoms are omitted for clarity.

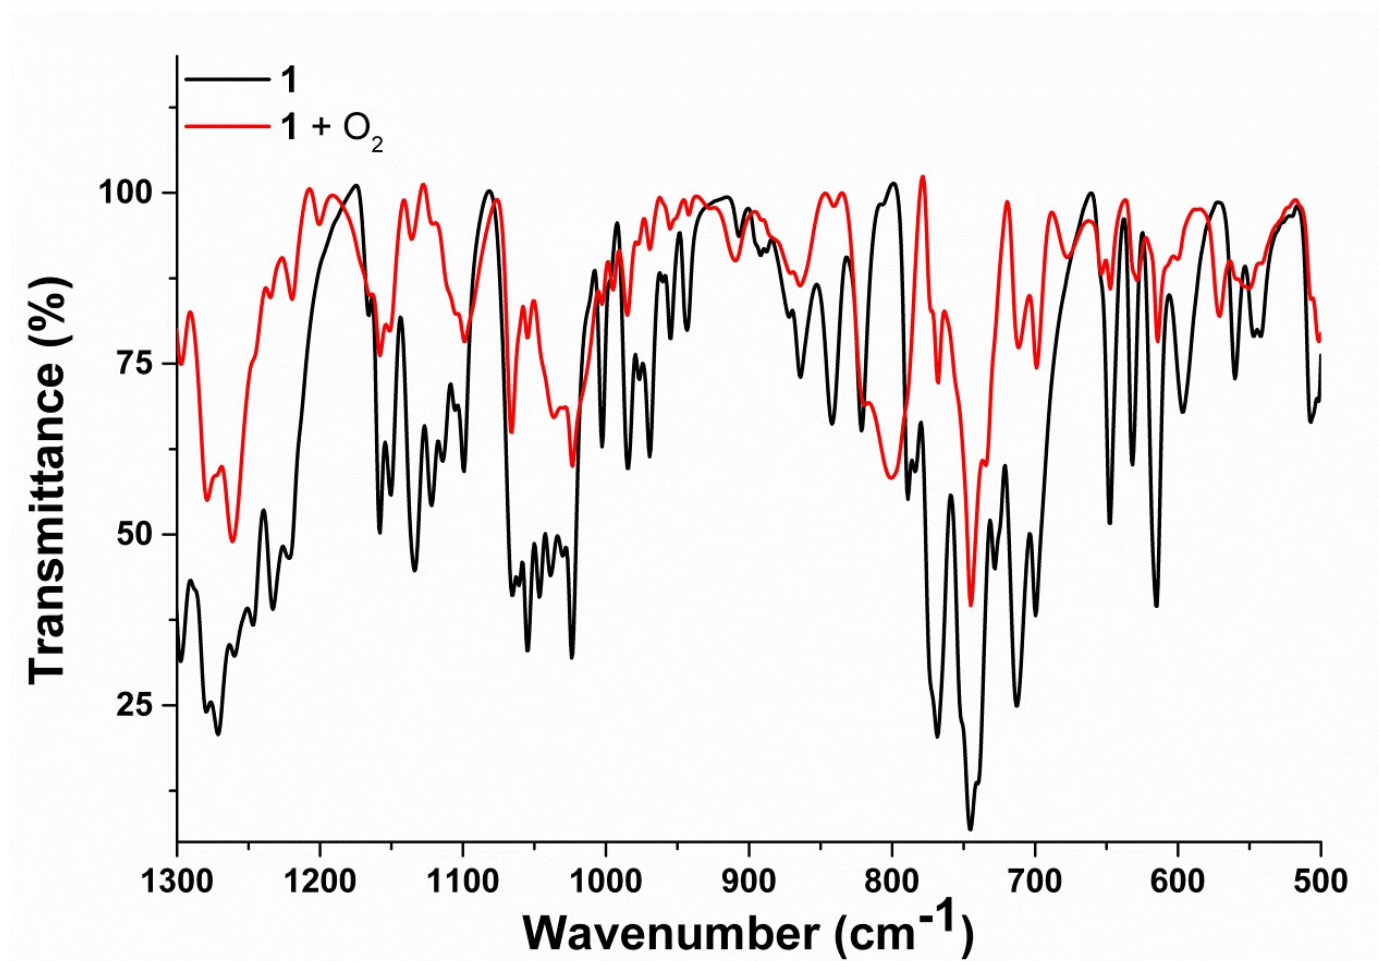

**Figure S7.** Solid IR spectra of complex **1** and oxygenated complex **1** (the preparation of oxygenated complex **1** was described in the experimental section).

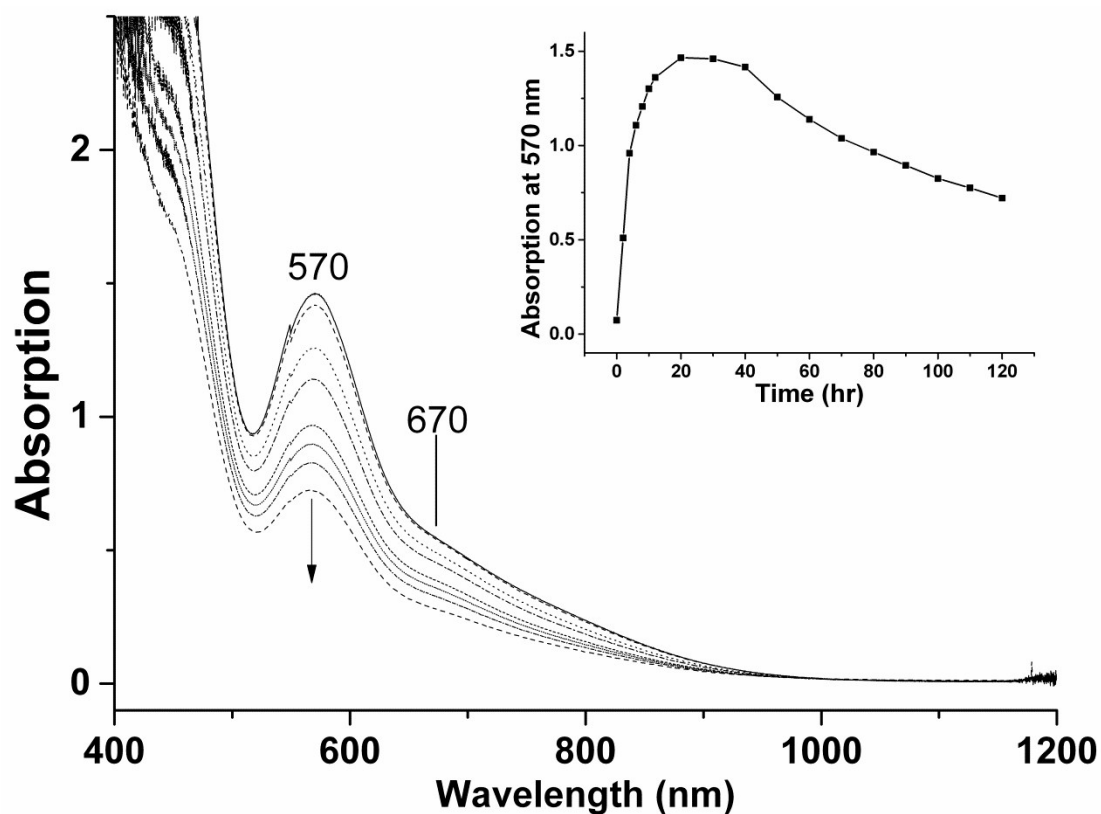

**Figure S8.** UV-vis spectral changes of the decaying  $\text{Fe}^{\text{III}}\text{-O}_2\text{-Fe}^{\text{III}}$  intermediate for the reaction of **1** with limited excess  $\text{O}_2$  in DMSO at RT. The inset shows the time-dependent formation and degradation of the  $\text{Fe}^{\text{III}}\text{-O}_2\text{-Fe}^{\text{III}}$  intermediate by following the absorption band at 570 nm.

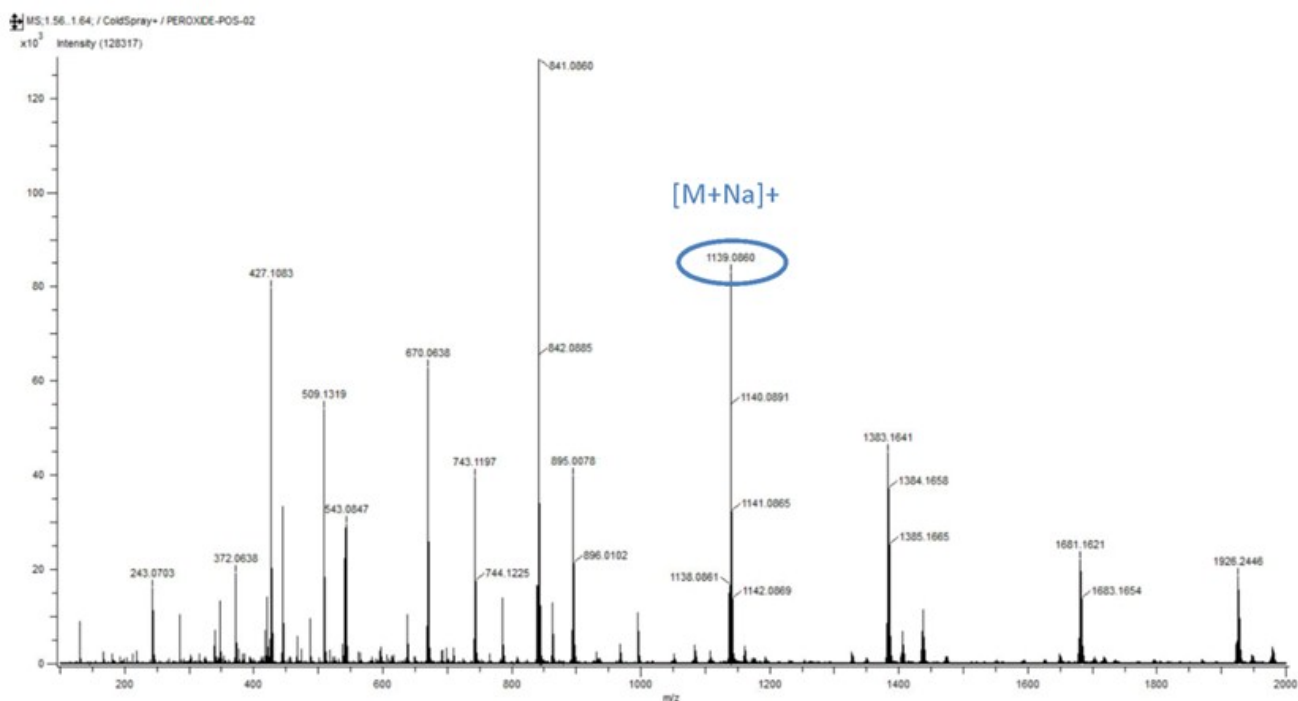

**Figure S9.** CSI-TOF MS analysis of pure **1** reacted with a slight excess  $\text{O}_2$  in DMF at  $-50^\circ\text{C}$ .

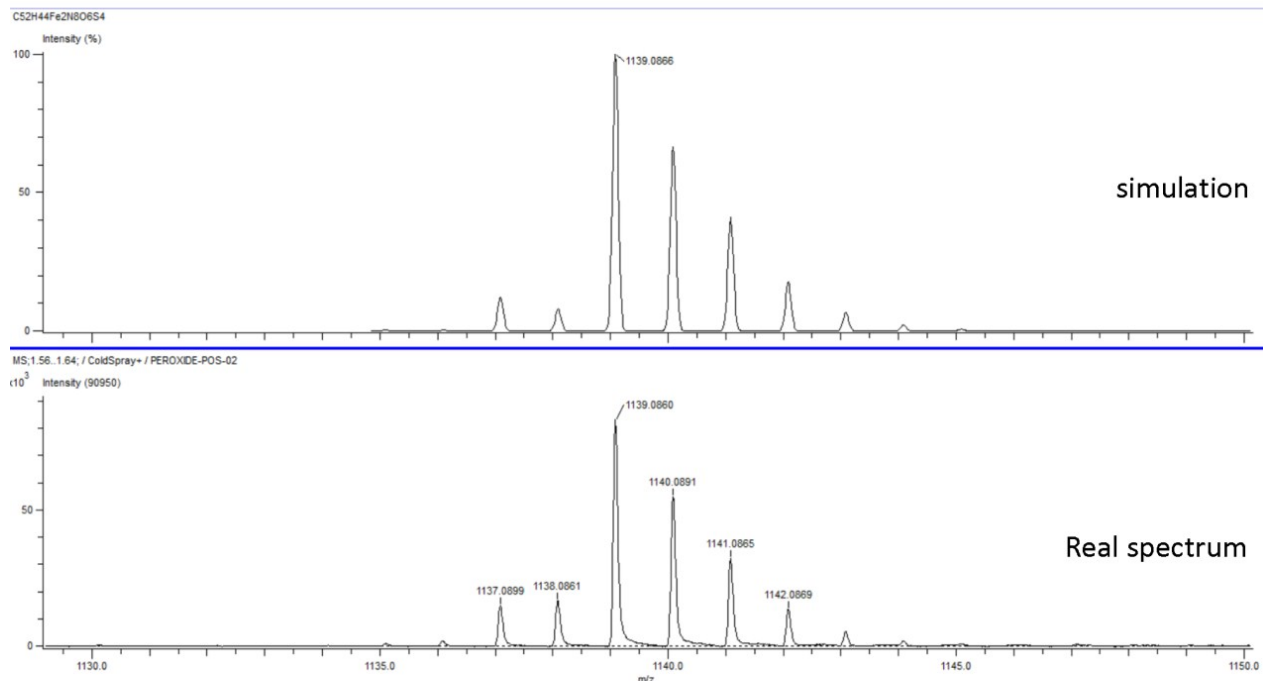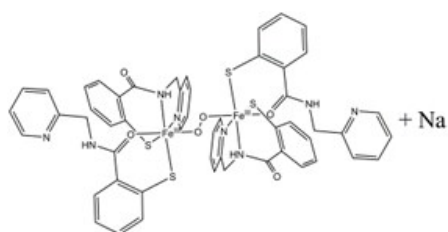

## Elemental Composition Estimation

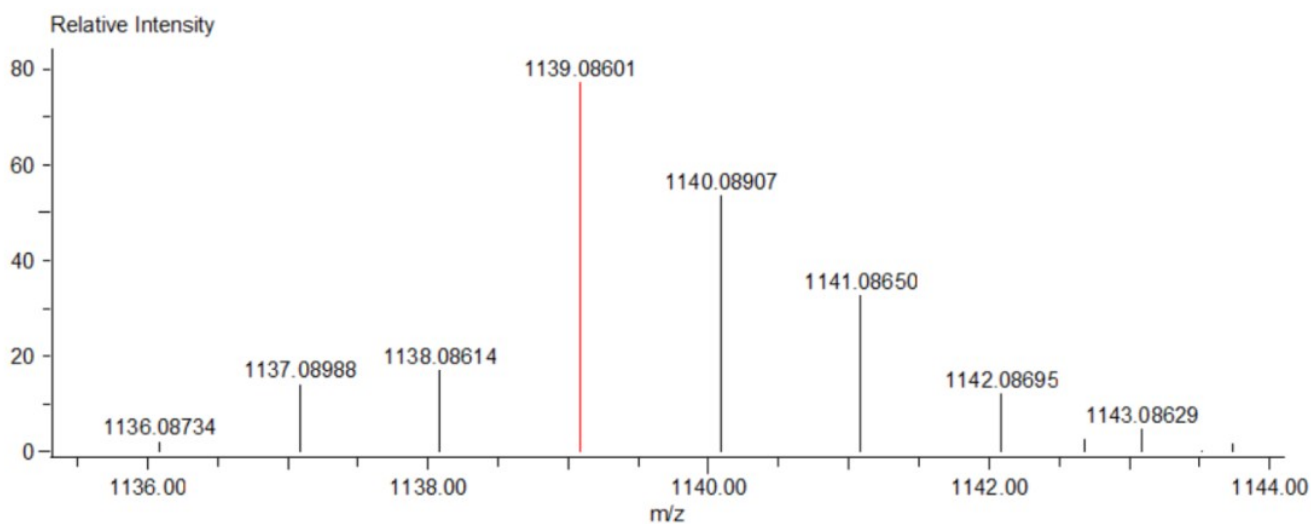

| Mass       | Calc. Mass | Mass Difference [mDa] | Mass Difference [ppm] | Possible Formula                                                                                                   |
|------------|------------|-----------------------|-----------------------|--------------------------------------------------------------------------------------------------------------------|
| 1139.08601 | 1139.08632 | -0.31                 | -0.27                 | $^{12}\text{C}_{52}^{1}\text{H}_{44}^{56}\text{Fe}_2^{14}\text{N}_8^{23}\text{Na}_1^{16}\text{O}_6^{32}\text{S}_4$ |

**Figure S10.** The HRMS data along with isotopic distribution pattern of  $\text{Fe}^{\text{III}}\text{-O}_2\text{-Fe}^{\text{III}}$  complex with the composition of  $[\mathbf{1} + \text{O}_2 + \text{Na}]^+$ .

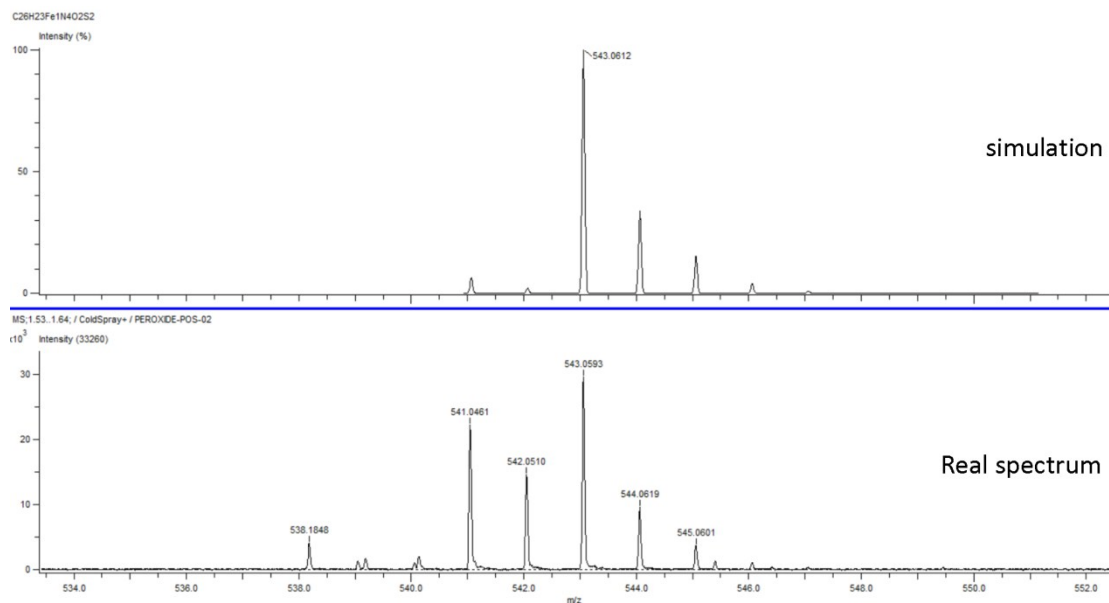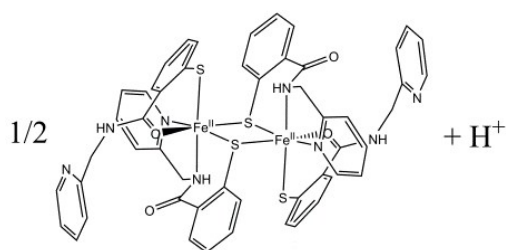

## Elemental Composition Estimation

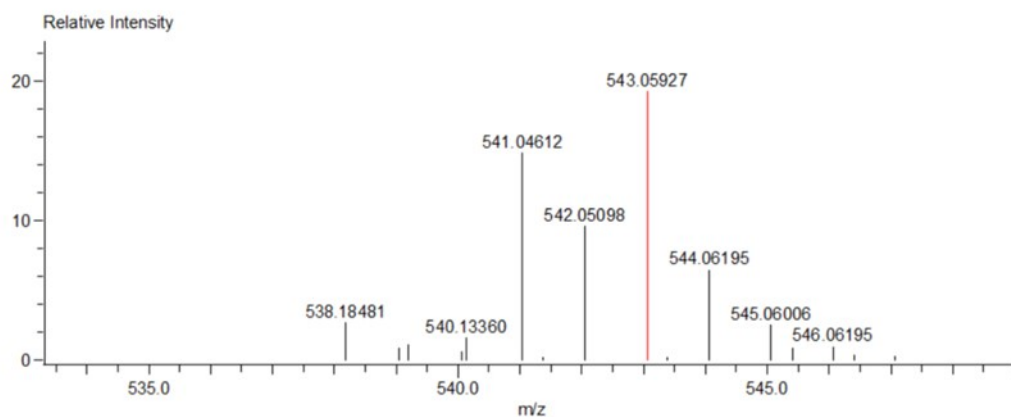

| Mass      | Calc. Mass | Mass Difference [mDa] | Mass Difference [ppm] | Possible Formula                                                                                                                                                                |
|-----------|------------|-----------------------|-----------------------|---------------------------------------------------------------------------------------------------------------------------------------------------------------------------------|
| 543.05927 | 543.06118  | -1.92                 | -3.53                 | <sup>12</sup> C <sub>26</sub> <sup>1</sup> H <sub>23</sub> <sup>56</sup> Fe <sub>1</sub> <sup>14</sup> N <sub>4</sub> <sup>16</sup> O <sub>2</sub> <sup>32</sup> S <sub>2</sub> |

**Figure S11.** The HRMS data along with isotopic distribution pattern of monomeric **1** complex with the composition of [0.5×**1** + H]<sup>+</sup>.

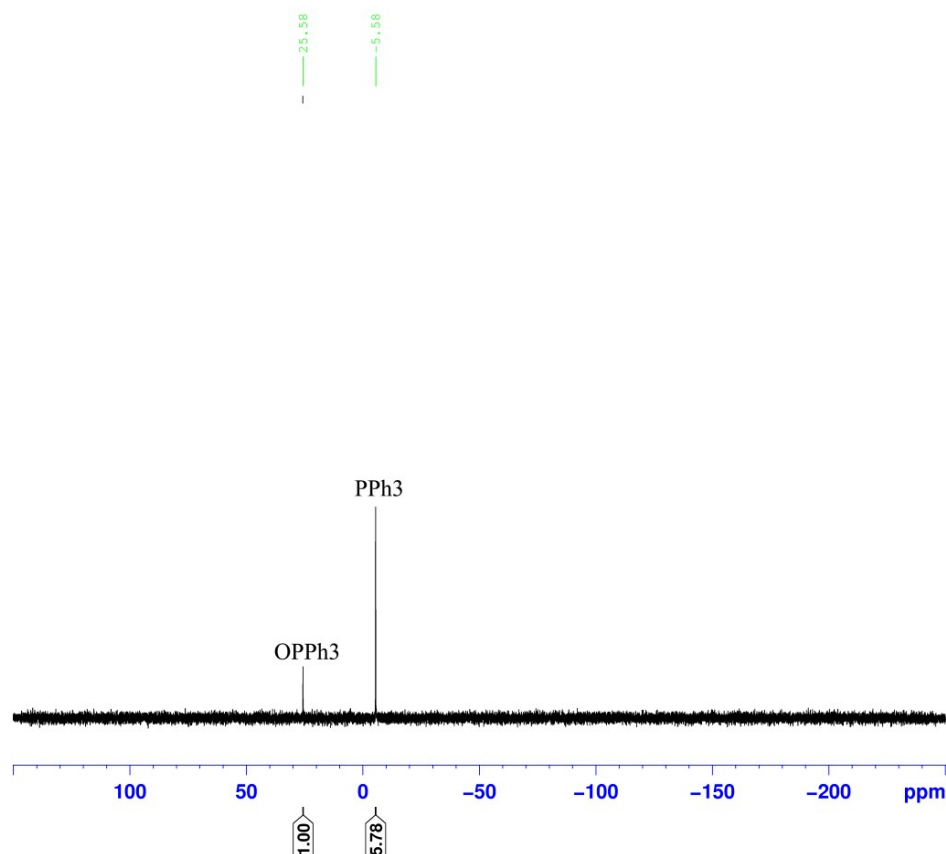

**Figure S12.**  $^{31}\text{P}\{^1\text{H}\}$  NMR spectrum at 298 K. Four equiv.  $\text{PPh}_3$  was added to complex **1** in DMF, and then the solution was exposed to air for 20 mins.

---

23-S1-APCI-H#1-20 RT: 0.00-0.28 AV: 20  
T: FTMS + p APCI corona Full ms [100.00-2000.00]  
m/z= 172.0345-185.4797  
Isotope Min Max  
C-12 0 14  
H-1 0 20  
Charge 1  
Mass tolerance 140.00 ppm  
Nitrogen rule not used  
RDB equiv -1.00-100.00  
max results 1

| m/z      | Intensity | Relative | Theo. Mass | Delta (ppm) | Composition                  |
|----------|-----------|----------|------------|-------------|------------------------------|
| 179.0852 | 17263.3   | 100.00   | 179.0855   | -1.61       | $\text{C}_{14}\text{H}_{11}$ |

**Figure S13.** HRMS of anthracene for hydride-transfer reaction. 9, 10-dihydroanthracene was added to complex **1** in DCM, and the solution was exposed to air for 30 mins.



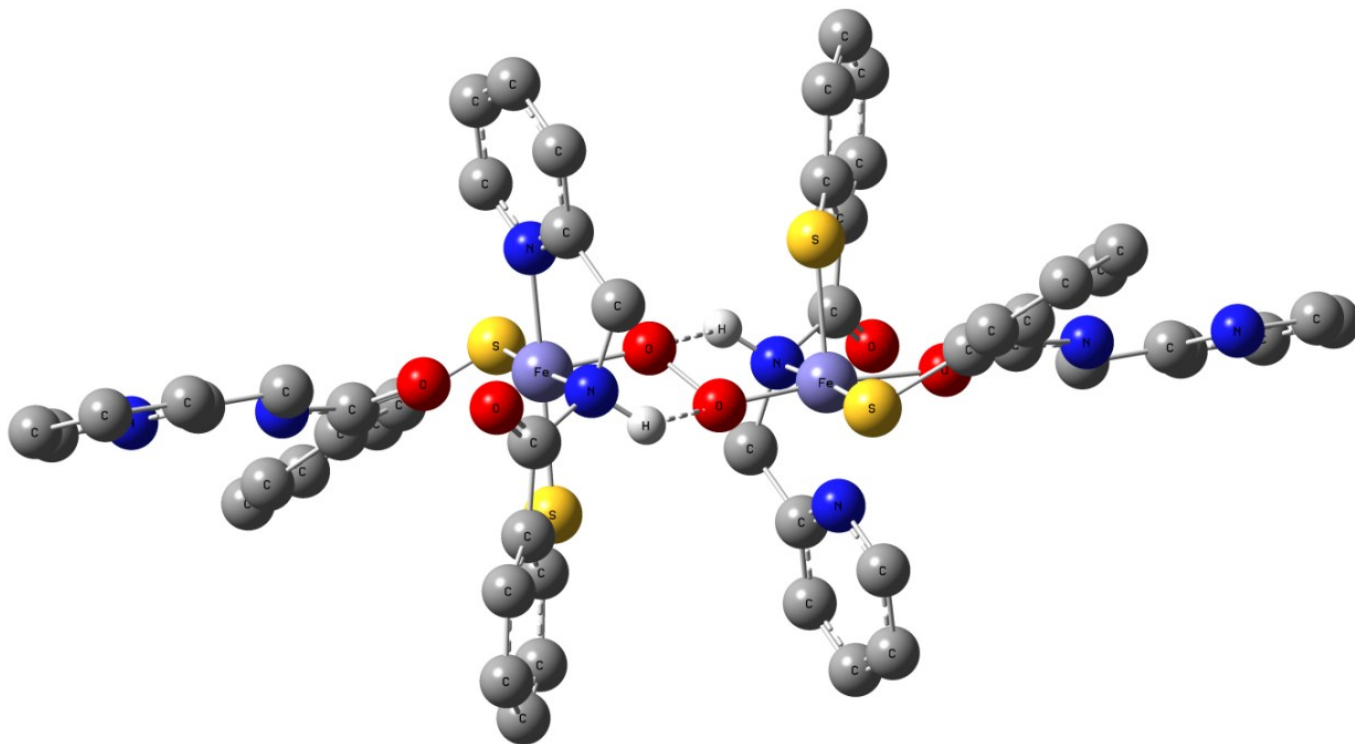

**Figure S14.** The intramolecular hydrogen bond interactions of the intermediate with **end-on** conformation (A) by DFT calculation. The N-O and N-H $\cdots$ O bond distances are 2.69 Å and 1.92 Å, respectively. The other hydrogens were omitted for clarity.

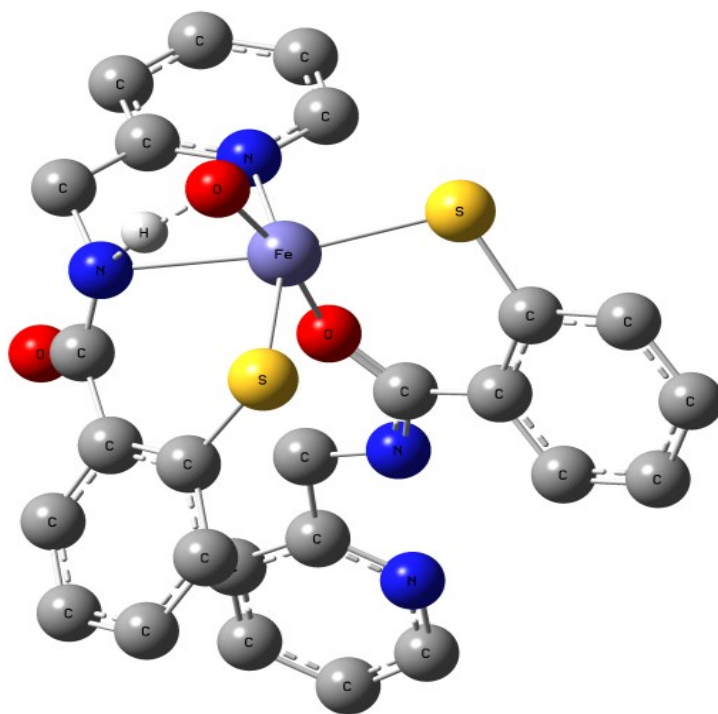

**Figure S15.** Ball- and stick-type drawings of the transition state **TS**. Some hydrogen atoms are omitted for clarity.

## References

1. P. Ghosh, A. Begum, E. Bill, T. Weyhermüller and K. Wieghardt, *Inorg. Chem.*, 2003, **42**, 3208-3215.
2. G. Musie, C.-H. Lai, J. H. Reibenspies, L. W. Sumner and M. Y. Darensbourg, *Inorg. Chem.*, 1998, **37**, 4086-4093.
3. D. K. Mills, Y. M. Hsiao, P. J. Farmer, E. V. Atnip, J. H. Reibenspies and M. Y. Darensbourg, *J. Am. Chem. Soc.*, 1991, **113**, 1421-1423.
4. W.-J. Hu and S. J. Lippard, *J. Am. Chem. Soc.*, 1974, **96**, 2366-2372.
5. D. Sellmann, J. Utz and F. W. Heinemann, *Inorg. Chem.*, 1999, **38**, 459-466.
6. D. Sellmann, Kai P. Peters and Frank W. Heinemann, *Eur. J. Inorg. Chem.*, 2004, **2004**, 581-590.
